# Supplementary material
Source: PubMed Central journal article supplement (PMC1500970)
Supplement: 7601182s1.pdf [file 7601182s1.pdf]

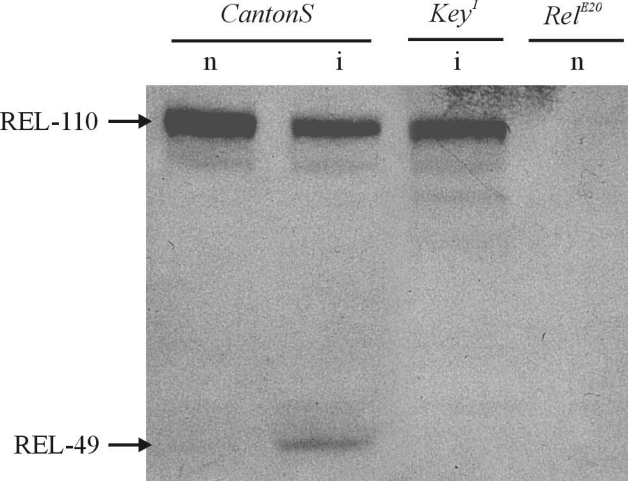

Figure S1. Relish cleavage is blocked in *key1* mutant animals and Relish protein is absent in *Rel<sup>E20</sup>* mutant animals. Extracts from naive (n) or *E. cloacae*-infected (i) larvae were prepared and analyzed as described in Figure 2 and methods.
